# Supplementary material for: Global translation during early development depends on the essential transcription factor PRDM10
Source: PubMed Central journal article supplement (PMC7368010; doi:10.1038/s41467-020-17304-3), 2020-07-17
Supplement: 41467_2020_17304_MOESM4_ESM.pdf [file 41467_2020_17304_MOESM4_ESM.pdf]

## **Description of Additional Supplementary Files**

File Name: Supplementary Data 1

Description: PRDM10 CHIP-seq peaks

File Name: Supplementary Data 2

Description: Differential gene expression for KO vs. WT mESCs at Day 2 post-deletion

File Name: Supplementary Data 3

Description: Differential gene expression for KO vs. WT mESCs at Day 4 post-deletion

File Name: Supplementary Data 4

Description: GO enrichment analysis of genes differentially expressed (KO vs. WT,  $p_{adj} < 0.05$ ) at Day 4

File name: Supplementary Data 5

Description: Gene expression in 8-cell stage embryos (MUT vs. CTL)

File name: Supplementary Data 6

Description: Genes associated with PRDM10 binding sites

File name: Supplementary Data 7

Description: Genes bound by PRDM10 and differentially expressed in Prdm10-null mESCs/embryos ( $p_{adj} < 0.05$ , fold-change  $> 2$ )

File name: Supplementary Data 8

Description: Oligonucleotide sequences
